# Supplementary material for: A multi-centennial record of past floods and earthquakes in Valle d'Aosta, Mediterranean Italian Alps
Source: Copernicus journal article supplement (doi:10.5194/nhess-2016-364), 2016-11-21
Supplement: Supplementary file [file nhess-2016-364-AC2-supplement.pdf]

# A multi-centennial record of past floods and earthquakes in Valle d'Aosta, Mediterranean Italian Alps

Bruno Wilhelm<sup>1</sup>, Hendrik Vogel<sup>2</sup>, Flavio S. Anselmetti<sup>2</sup>

<sup>1</sup>University Grenoble Alpes, CNRS, IRD, Institut des Géosciences et de l'Environnement, F-38000 Grenoble, France

<sup>2</sup>Institute of Geological Sciences and Oeschger Centre for Climate Change Research, University of Bern, CH-3012 Bern, Switzerland

*Correspondence to: B. Wilhelm (bruno.wilhelm@univ-grenoble-alpes.fr)*

## Abstract

Mediterranean Alpine populations are particularly exposed to natural hazards like floods and earthquakes because of both the close Mediterranean humidity source and the seismically active Alpine region. Knowledge of long-term variability in flood and earthquake occurrences is of high value since it can be useful to improve risk assessment and mitigation. In this context, we explore the potential of a lake-sediment sequence from Lago Inferiore de Laures in Valle d'Aosta (Northern Italy) as a long-term record of past floods and earthquakes. The high-resolution sedimentological study revealed 76 event layers over the last ca. 270 years; 8 are interpreted as most probably induced by earthquakes and 68 by flood events. Comparison to historical seismic data suggests that the recorded earthquakes are strong (epicentral MSK intensity of VI-IX) and/or close to the lake (distance of 25-120 km). Compared to other lake-sediment sequences, Lago Inferiore de Laures sediments appear to be regionally the most sensitive to earthquake shaking, offering a great potential to reconstruct the past regional seismicity further back in time. Comparison to historical and palaeoflood records suggests that the flood signal reconstructed from Lago Inferiore de Laures sediments well represents the regional and (multi-)decennial variability of summer-autumn floods, in connection to Mediterranean mesoscale precipitation events. Overall, our results reveal the high potential of Lago Inferiore de Laures sediments to extend the regional earthquake and flood catalogues far back in time.

**Key-words:** sediment record, earthquake, flood, century, Mediterranean Alps

## 1. Introduction

Natural hazards (e.g. earthquakes, floods, landslides, etc.) are of particular concern for societies as they cause widespread loss of life, damage to infrastructure and economic deprivation (e.g. Munich Re Group, 2003). The frequency of both geological (i.e. earthquakes) and hydrological (i.e. floods) events vary in time mainly as a function of tectonic processes and climatic regimes, respectively. Such changes need to be taken into account for robust risk assessments. This becomes even more crucial in the context of global warming, which is expected to

lead to a modification of the hydrological cycle and associated floods. However, available instrumental time-series generally cover a short time span, precluding a comprehensive knowledge of the tectonic and climatic-related variability. In this respect, historical and natural archives were widely studied to extend earthquake and flood catalogues further back in time (e.g. Guidaboni et al., 2007; Rizza et al., 2011; Brázdil et al., 2012; Ballesteros-Cánovas et al., 2015; Benito et al., 2015; Denniston et al., 2015; Ratzov et al., 2015). Among them, lake sediments have shown to be valuable archives as they record past events in a continuous and high-resolution mode (e.g. Lauterbach et al., 2012; Wilhelm et al., 2012a; Strasser et al., 2013; Wirth et al., 2013; Amman et al., 2015; Van Daele et al., 2015). The greater hydraulic energy of flooded rivers increases their capacity to erode and transport sediments. Downstream, lakes may act as sediment traps, resulting in the deposition of a coarser-grained layer that will be preserved in time (e.g. Gilli et al., 2013; Schillereff et al., 2014). In case of earthquakes, ground shaking may disturb lake sediments by triggering co-seismic in situ deformation or post-seismic deposits related to subaquatic mass movements of slope sediments and resuspension (e.g. Avşar et al., 2014; Van Daele et al., 2015). Identification and dating of all ‘event layers’ in sediment cores enable to reconstruct past event occurrences over century to millennia. Recently, some studies have also developed methods to reconstruct the magnitude of past events. The magnitude of past flood events may be reconstructed through grain size (e.g. Schiefer et al., 2011; Lapointe et al., 2012; Wilhelm et al., 2015; Schillereff et al., 2015) or through the total volume of sediments transported and deposited during the flood (e.g. Jenny et al., 2014; Wilhelm et al., 2015). Reconstruction of past earthquake magnitudes and location is approached by comparing regional records of seismic-induced deposits (e.g. Strasser et al., 2006; Wilhelm et al., 2016b) or through the deposit’s spatial extent and thickness (Howarth et al., 2014; Moernaut et al., 2014).

The southern European Alps (Northern Italy) are particularly harmed by natural hazards such as floods and earthquakes (e.g. Boschi et al., 2000; Guzzetti and Tonelli, 2004; Eva et al., 2010), due to the proximity of both the Mediterranean Sea and the seismically-active Alpine region. The Mediterranean Sea is the primary moisture source for orographic precipitation on the southern flank of the Alps (e.g. Buzzi and Foschini, 2000; Lionello et al., 2012). Spatially restricted convective and spatially more exhaustive cyclonic precipitation events may lead to catastrophic floods (Gaume et al., 2009; Marchi et al., 2010), as it for instance occurred in October 2000 or June 1957 (Ratto et al., 2003). Moreover, the south-western European Alps is a seismogenic region that experienced strong earthquakes with macroseismic Medvedev-Sponheuer-Kárník (MSK) intensities up to IX and estimated magnitudes higher than 6., e.g. the Ligurian earthquake in 1887 ( $M_w = 6.8$ ; Larroque et al., 2012) and the Visp earthquake in 1855 ( $M_w = 6.2$ ; Fäh et al., 2011; Fig. 1),

In this context, the present study aims at exploring the potential of a lake sequence as recorder of past floods and earthquakes in the western Italian Alps. This is undertaken by studying the high-elevation sediment sequence of Lago Inferiore de Laures, Valle d’Aosta.

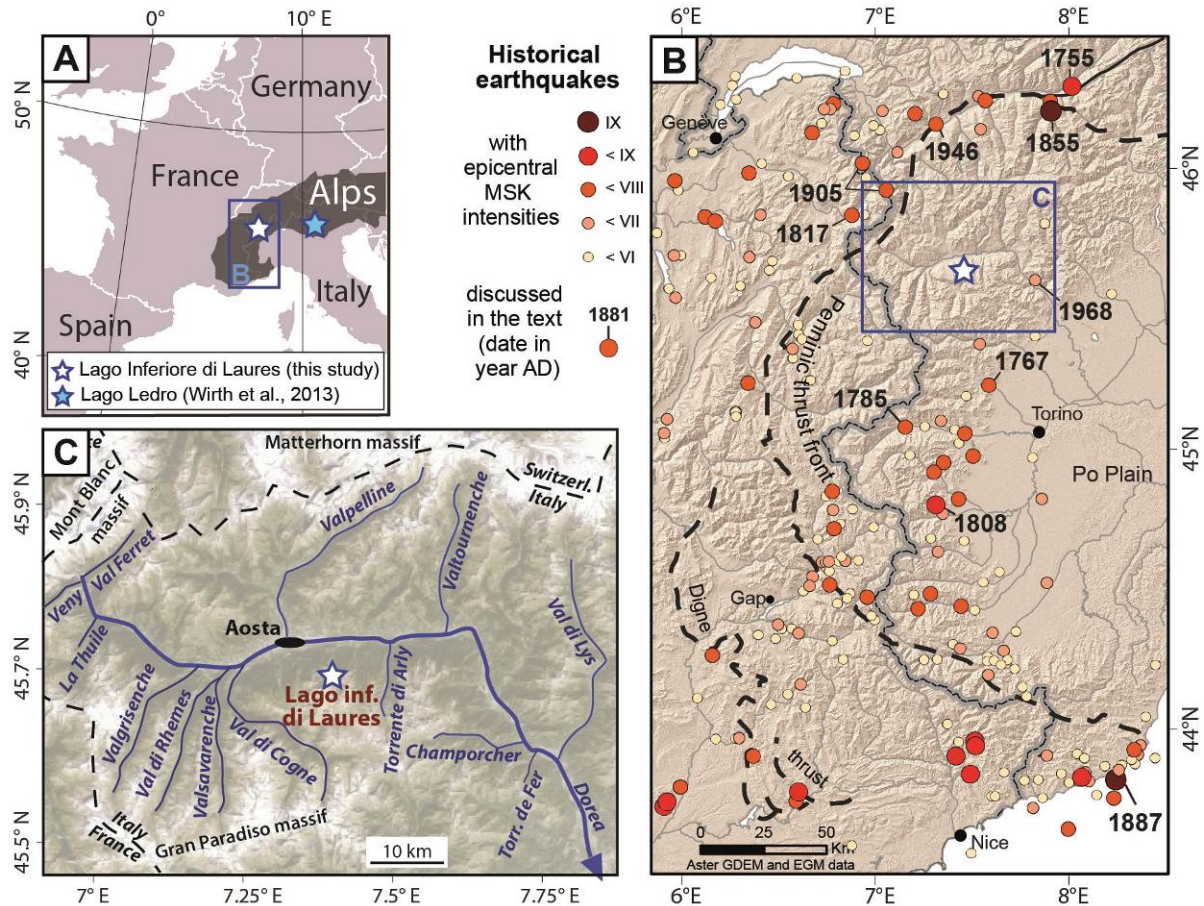

**Figure 1.** Location of Lago Inferiore de Laures in the Mediterranean Italian Alps (A), with locations of historical earthquakes with epicentral MSK intensity above IV (B). The earthquake catalog is provided by the database SisFrance (<http://infoterre.brgm.fr/>; Lambert and Levret-Albaret, 1996; Scotti et al., 2004). Location of Lago Inferiore de Laures catchment area in the hydrological network of Vallee d'Aosta (C).

## 2. Study site

Valle d'Aosta is located at the foot of the Mont Blanc and Monte Rosa massifs, north to the vast Italian Po Plain, and ~180 km north of the Mediterranean Sea (Fig. 1). Lago Inferiore de Laures (2450 m a.s.l., 45°41'N, 7°24'E) is a small, high-elevation lake located on the north-facing slope of Vallee d'Aosta (Fig. 1C). Due to the high elevation of the catchment, only the area surrounding the lake is covered by alpine meadow vegetation, which is impacted by grazing activity. Most of the catchment is covered by **bedrock** and scree. Rock is mainly made of eclogitic micaschist, which was eroded by small glaciers in the western and southern parts of the catchment as evidenced by the presence of glacial deposits and moraines (Fig. 2). These glaciers have disappeared and only a rock glacier is still active in the south-eastern part of the catchment. The catchment is mainly drained by the mountain stream that crosses Lago Superiore and Lago Lungo before entering Lago Inferiore. These two upper lakes act as two sediment traps and, thereby, all the upper part of the catchment **barely** contributes to the detrital inputs in Lago Inferiore. Detrital inputs are mainly provided by (i) the lower part of the main stream and its eastern tributary and (ii) a temporary stream that drains glacial deposits west from the lake. This results in two distinct major detrital input sources to the lake, as suggested by the aerial and subaquatic deltas built on the



eastern and western lake shores. Mobilization of detrital material is restricted to summer months and beginning of autumn (June/July to mid-November) when the lake ice cover is absent and catchment soils are thawed and free of snow cover.

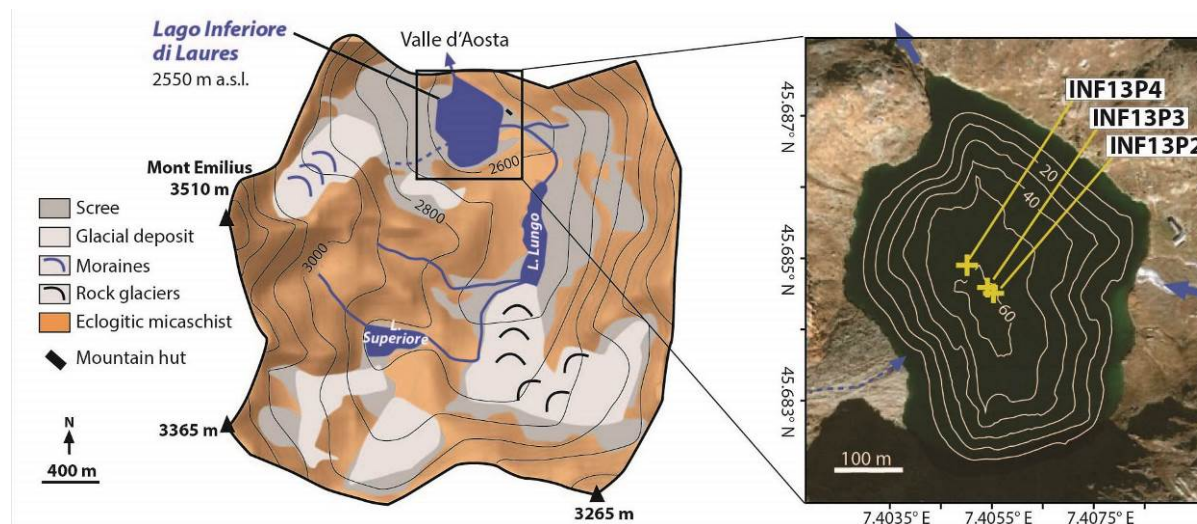

**Figure 2.** Geological and geomorphological characteristics of the Lago Inferiore de Laures catchment area (left panel). Bathymetric map of Lago Inferiore de Laures and coring sites (right panel).

### 3. Methods

#### 3.1. Core description and logging

In fall 2013, a bathymetric survey with a single-beam echosounder was carried out at Lago Inferiore and revealed a narrow flat basin in the centre of the lake with a maximum water depth of 60.7 m (Fig. 2). Three up to 62 cm long gravity cores have been retrieved from the depocenter of the lake. The uppermost 13 cm of core INF13P2 were disturbed during the coring. The three cores were split lengthwise and the visual macroscopic features of each core were examined in detail to determine the different sedimentary facies. Based on these facies, a stratigraphic correlation was carried out between the three cores to document the spatial extent and succession of the different facies over the lake basin.

High-resolution images and gamma-ray attenuation bulk density (GRAPE) data were acquired on a Geotek<sup>TM</sup> multisensor core-logger (Institute of Geological Sciences, University of Bern). The bulk density is obtained at a 5-mm downcore resolution. X-Ray analyses on the core INF13P3 were carried out on an Itrax<sup>TM</sup> (Cox Analytical Systems) X-ray fluorescence (XRF) core scanner (Institute of Geological Sciences, University of Bern), using a Molybdenum tube, set to 30 kV, 35 mA with a 10-s count-time and a 1-mm sampling step. The scattered incoherent (Compton) radiation of the X-ray tube ( $Mo_{inc}$ ) varies with bulk element mass/sediment density (Croudace et al., 2006) and, thereby, provides a high-resolution proxy for sediment density (e.g. Wilhelm et al., 2016a).  $Mo_{inc}$  values were averaged at a 5-mm resolution for correlation with the GRAPE-density, which resulted in a linear, positive, and significant correlation ( $r=0.88$ ,  $p<10^{-4}$ ). This allowed using  $Mo_{inc}$  as a proxy of sediment density for identifying mm-scale event layers, e.g. flood and mass-movement deposits. Event layers are

characterized by higher density because of the high amount of detrital material provided in a short time (e.g. Støren et al., 2010; Gilli et al., 2012; Wilhelm et al., 2012b).

Grain-size analyses were performed on core INF13P3 using a Malvern Mastersizer 2000 (Institute of Geography, University of Bern) at a 5-mm continuous interval. Before the grain-size analysis, the samples have been treated in a **temperate** bath of diluted **(30%)** hydrogen peroxyde during 3 days to remove the organic matter. The disappearance of the organic matter was checked through smear slide observations. Grain-size analyses of the detrital material were performed to characterize the transport-deposition dynamics of the deposits (e.g. Passega, 1964; Wilhelm et al., 2013; 2015).

### 3.2. Dating methods

To date the lake sequence over the last century, short-lived radionuclides ( $^{226}\text{Ra}$ ,  $^{210}\text{Pb}$ ,  $^{137}\text{Cs}$ ) were measured by gamma spectrometry at EAWAG (Dübendorf, Switzerland). The core INF13P3 was sampled following a non-regular step of  $1 \pm 0.2$  cm, matching the facies boundaries. The  $^{137}\text{Cs}$  measurements generally allow two main chronostratigraphic markers to be located: the fallout of  $^{137}\text{Cs}$  from atmospheric nuclear weapon tests culminating in AD 1963 and the fallout of  $^{137}\text{Cs}$  from the Chernobyl accident in AD 1986 (Appleby, 1991).  $^{226}\text{Ra}$  is measured as a proxy for the supported  $^{210}\text{Pb}$  in order to calculate the unsupported  $^{210}\text{Pb}$  that corresponds to the excess  $^{210}\text{Pb}$  (e.g. Schmidt et al., 2014). The decrease in excess  $^{210}\text{Pb}$  ( $^{210}\text{Pb}_{\text{ex}}$ ) and the Constant Flux/Constant Sedimentation (CFCS) model allow a mean sedimentation rate to be calculated (Goldberg, 1963). The standard error of the linear regression of the CFCS model is used to assess the uncertainty of the sedimentation rate. The  $^{137}\text{Cs}$  chronostratigraphic markers are then used to control the validity of the  $^{210}\text{Pb}$ -based sedimentation rate.

In addition to short-lived radionuclides, historical lead (Pb) contaminations were also used to control the  $^{210}\text{Pb}$ -based chronology (e.g. Renberg et al. 2001). In order to identify lead contamination, we used the geochemical measurements carried out on the Itrax<sup>TM</sup> XRF core scanner on core INF13P3. Pb intensities were normalized to a well-measured detrital element, i.e. titanium (Ti), to disentangle natural and human-induced changes in Pb. Recorded Pb variations were compared to historical lead emissions in Switzerland (Weiss et al., 1999), the closest place to the studied site where lead emissions are well documented.

## 4. Results

### 4.1. Description of the sedimentary deposits

The sediment consists of a finely bedded, greenish brown mud mainly composed of detrital material with grain sizes in the silt-clay fraction and amorphous organic matter. Smear-slide observations reveal that the organic matter content increases upcore, concurrently to the dark brown colour of these deposits (Fig. 3). These fine-grained deposits representing the background hemi-pelagic sedimentation, are interrupted by 77 beds characterized by rather coarse material, lower organic matter content, and higher density. According to several studies providing a comprehensive overview of event layers (e.g., Mulder and Cochonat, 1996; Gani, 2004; Wilhelm et al., 2015; Van Daele et al., 2015), the 77 beds represent short-term depositional events and they

correspond to 74 graded beds (GBs), 1 matrix-supported bed (MSB), 1 homogeneous bed (HB) and 1 deformed layer (Fig. 3).

The 74 GBs are all characterized by a sharp and coarse-grained base, a fining-upward trend and a thin, whitish fine-grained capping layer. There is no evidence for erosive bases. The stratigraphic correlation reveals that almost all GBs appear in the three cores. Only four GBs identified in cores INF13P3 (33.3-35 cm) and INF13P4 (29.6-32 cm) are missing in core INF13P2. In core INF13P2, the four missing GBs stratigraphically correspond to a deformed layer (28-30 cm; Fig. 3).

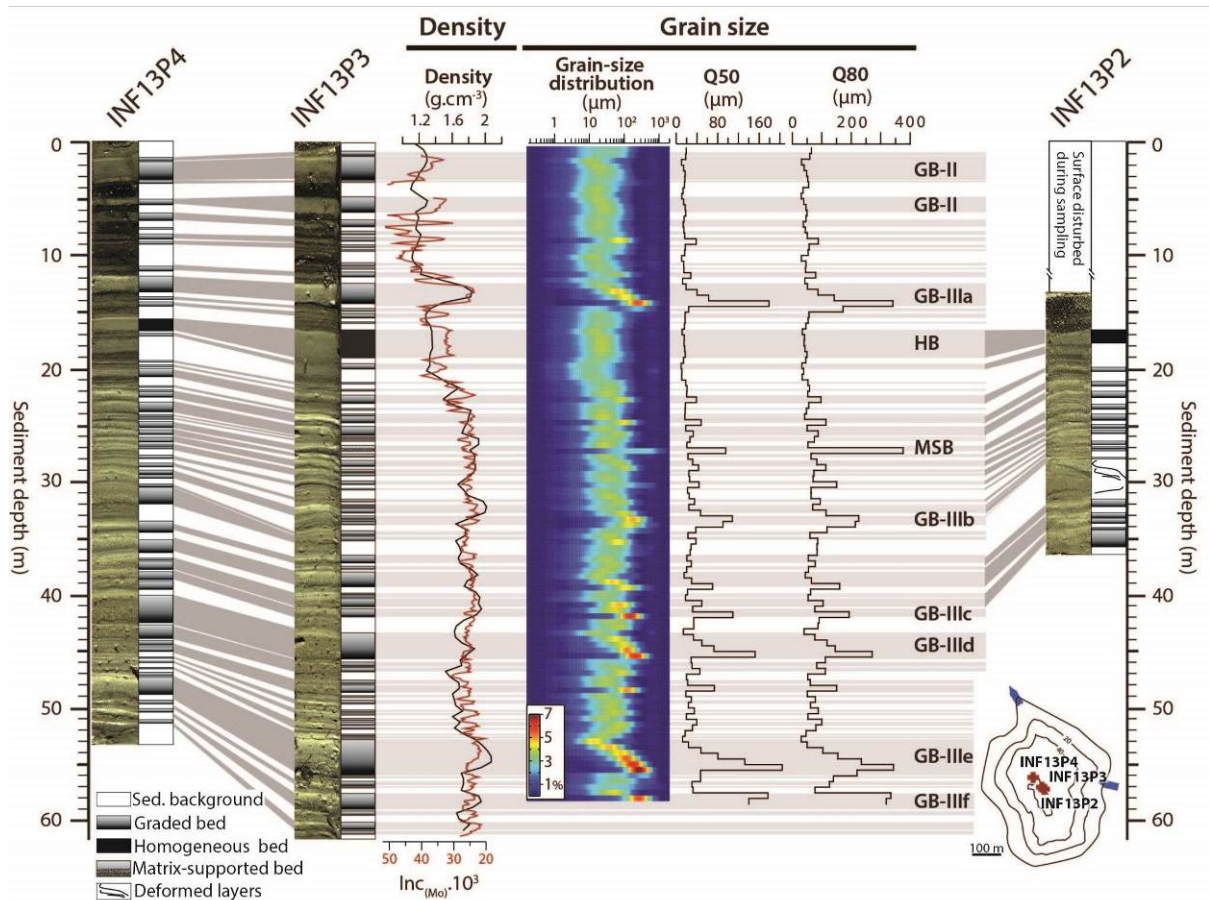

**Figure 3.** Lithological descriptions of cores and stratigraphic correlations based on sedimentary facies. Variability in grain-size distribution is shown for the core INF13P3. The density measurements performed by gamma-ray attenuation are shown close to  $Mo_{inc}$ , used as a high-resolution density proxy.

The Passega-type (D50 vs. D80) diagram highlights a steady decrease of both the median (D50) and the coarse percentile (D80) from the base to the top of the GBs (Fig. 4A). This confirms the visually-identified fining-upward trend of all GBs. ‘D50<sub>max</sub> vs. deposit thickness’ and ‘D80<sub>max</sub> vs. deposit thickness’ diagrams (where D50<sub>max</sub> and D80<sub>max</sub> are defined as the highest value of D50 and D80 of each GB) suggest that the 74 GBs may be differentiated in 3 types (Fig. 4A). Most of the GBs (66 of 74) form a well-grouped cluster characterized by low values of thickness (1 - 10 mm), D50<sub>max</sub> (10 - 50 μm) and D80<sub>max</sub> (35 - 115 μm). These 66 GBs are labelled GB-I (dark blue points, Fig. 4A). These diagrams highlight 2 GBs, labelled GB-II (light blue points, Fig. 4A), also

characterized by a very fine grain size ( $D50_{max}$  of 16-18  $\mu\text{m}$  and  $D80_{max}$  of 50-52  $\mu\text{m}$ ) but a larger thickness (14-21 mm) than GB-I. As a result, GB-II is characterized by an intermediate pattern between GB-I and HB. In contrast, some GBs (6 of 74; labelled GB-III; red points, Fig. 4A) are scattered in the ‘percentile vs. thickness’ diagrams but well distinguishable from GB-I and GB-II because of both their coarser grain size ( $D50$  of 70 - 200  $\mu\text{m}$  and  $D80$  of 160 - 350  $\mu\text{m}$ ) and larger thickness (from 3 to 33 mm). The distinct characteristics of the three GB types suggest distinct dynamics of sediment transport and deposition and, thereby, distinct triggers (discussed in sections 5.1.1. and 5.2.1.).

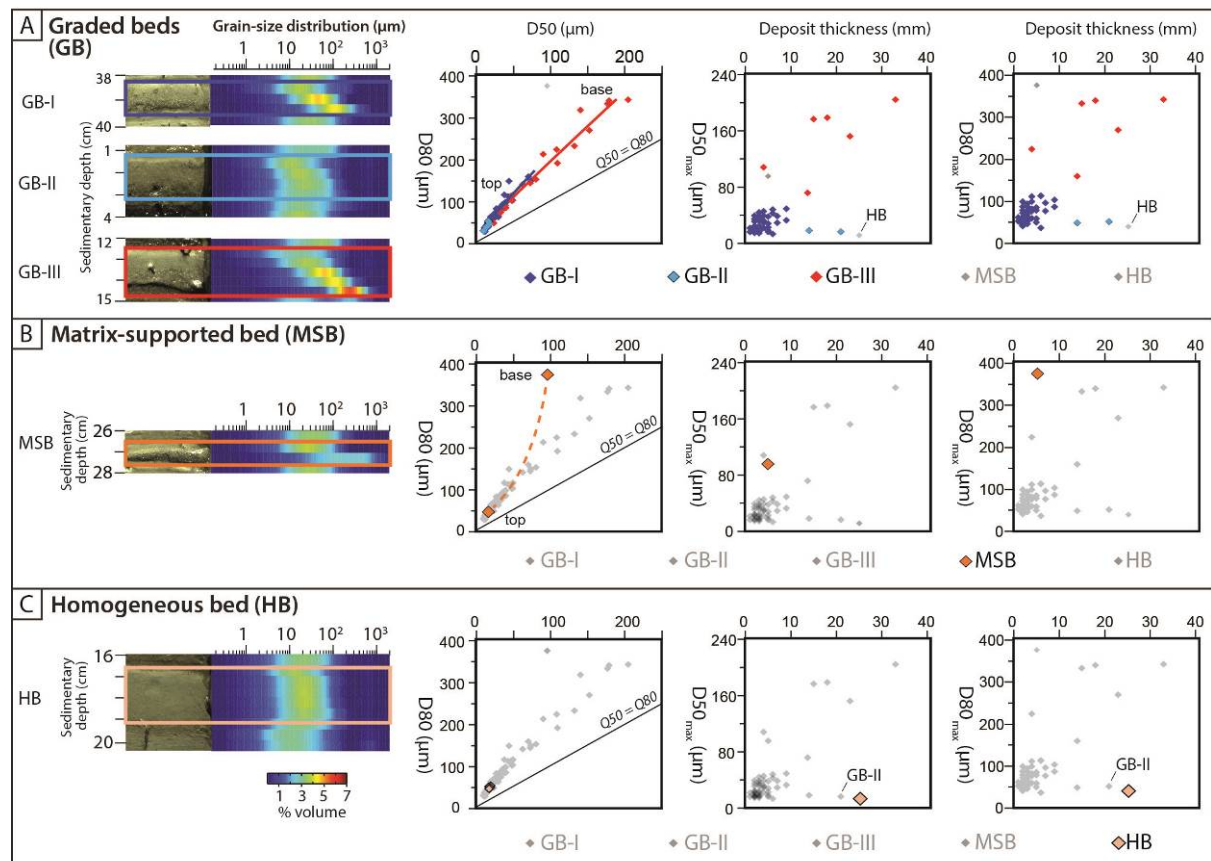

**Figure 4.** Close-eye views of event layers (left) and their positions in a Passega-type (Q50 vs. Q80) diagram as well as in ‘percentile vs. deposit thickness’ diagrams (right) for the graded beds (A), the matrix-supported bed (B) and the homogenous bed (C).

The MSB identified at 27 cm in core INF13P3 differs from the GBs by the poorly sorted fining-upward trend (Fig. 3 and 4B). This is well highlighted in the Passega-type diagram where the pattern is almost vertical, describing a large decrease of the coarse percentile ( $D80$ ) with much less variation of the median ( $D50$ ). The 2.5 mm-thick HB identified at 17 cm in core INF13P3 is characterized by a sharp base, a thin, whitish fine-grained capping layer and a central part with a fine and perfectly homogeneous grain size (Fig. 3 and 4C).

A 3.5 cm-thick layer at 28 cm in core INF13P2 is characterized by mixed beds in the lower part and folded beds in the upper part (Fig. 3). The stratigraphic correlation reveals that this deformed layer is overlain by a thin graded bed that becomes thicker in cores INF13P3 and INF13P4. In core INF13P3, this graded bed corresponds



to a GB-III (labelled GB-IIIb in Fig. 3). In addition, the stratigraphic correlation suggests that this deformed layer is not intercalated in the sediment sequence (e.g. slump) but corresponds to in situ deformation.

#### 4.2. Chronology

The excess  $^{210}\text{Pb}$  ( $^{210}\text{Pb}_{\text{ex}}$ ) profile in cores INF13P3 shows a steady decrease in activity from 436 to 11 Bq/kg. The profile is, however, punctuated by depths with very low values, which correspond to thick event layers (Fig. 5). We excluded  $^{210}\text{Pb}_{\text{ex}}$  values associated with these instantaneous deposits to construct a synthetic sediment record (Arnaud et al., 2002). The CFCS model (Goldberg, 1963) was applied to the synthetic  $^{210}\text{Pb}_{\text{ex}}$  profile and indicates that the sequence is characterized by two periods of different sedimentation rates (SR). SR shifts from  $1.1 \pm 0.2 \text{ mm.yr}^{-1}$  in the lower portion of the core to  $1.4 \pm 0.36 \text{ mm.yr}^{-1}$  in the topmost 5.5 cm. The CFCS model-derived ages were used to develop continuous age-depth relationships for core INF13P3 (Fig. 5). A synthetic  $^{137}\text{Cs}$  profile was built and displays a progressive increase until a peak of  $1400 \text{ Bq.kg}^{-1}$  at 9.5 cm (Fig. 5). Such high  $^{137}\text{Cs}$  values are unequivocal of the fallout associated to the 1986 Chernobyl accident in the region (e.g. Vannière et al., 2013; Wilhelm et al., 2012a; Etienne et al., 2012; Wilhelm et al., 2016a). The second expected peak related to the nuclear weapon tests in AD 1963 cannot as clearly defined. It might be diluted in the very high “Chernobyl” signal.

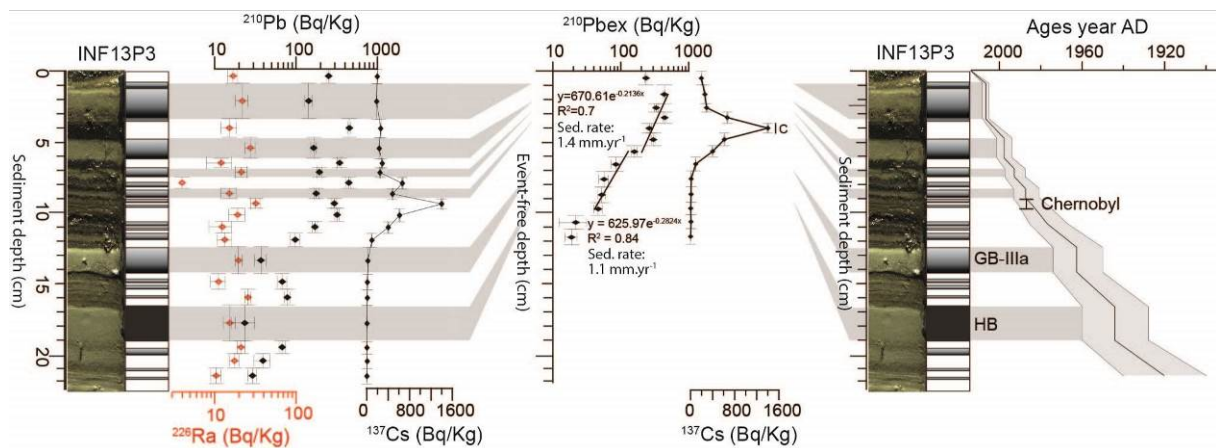

**Figure 5.**  $^{226}\text{Ra}$ ,  $^{210}\text{Pb}$  and  $^{137}\text{Cs}$  profiles for core INF13P3 (left). Application of a CFCS model to the event-free sedimentary profile of  $^{210}\text{Pb}_{\text{ex}}$ . Resulting age–depth relationship with  $1\sigma$  uncertainties and locations of the historic  $^{137}\text{Cs}$  peak of Chernobyl (AD 1986) supporting the  $^{210}\text{Pb}$ -based ages.

The Pb/Ti ratio shows a low background ( $\leq 0.5$ ) in the lower part of core INF13P3 (Fig. 6). At 21 cm, the Pb/Ti ratio increases and remains almost always above 0.5 upcore. From 13 to 8 cm, it reaches high values ( $> 1$ ) with a maximum at 10 cm ( $> 4$ ). These distinct steps well mirror historical Pb emissions in Switzerland with low emissions ( $< 500 \text{ tons.year}^{-1}$ ) until AD 1920 and high emissions ( $> 1000 \text{ tons.year}^{-1}$ ) from the 1950s to the 1980s, with a maximum around 1970 (Weiss et al., 1999). The increase of Pb emission in the 1920s may correspond to the beginning of the use of leaded gasoline and the peak in Pb emission (1970s) to its maximal use (Weiss et al., 1999; Arnaud et al., 2004). These two steps in historical Pb contaminations, well-marked in the Pb/Ti ratio, may thus be used as additional chronological markers.



Overall, the good chronological agreement between these independent markers ( $^{137}\text{Cs}$  peak and Pb peaks) and the  $^{210}\text{Pb}$ -derived ages supports the validity of our age-depth model (Fig. 7). The extrapolation of the CFCS model-derived ages suggest that core INF13P3 covers the ~270 years (Fig. 7).

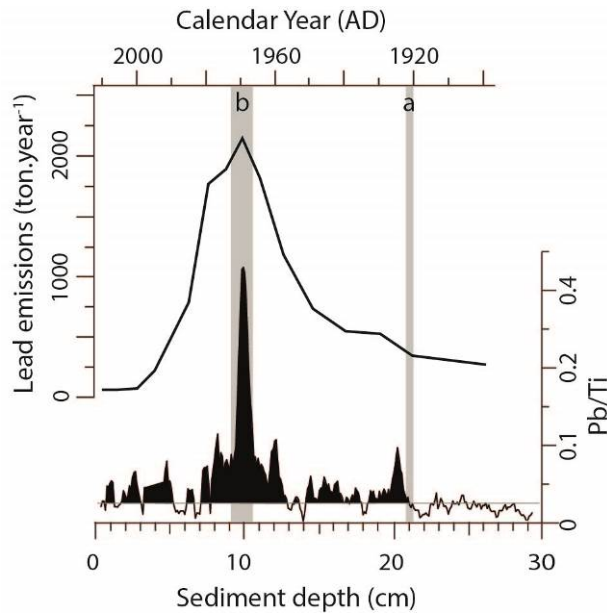

**Figure 6.** Historical lead (Pb) emissions in Switzerland (from Weiss et al., 1999) compared to the Pb/Ti ratio measured in core INF13P3.

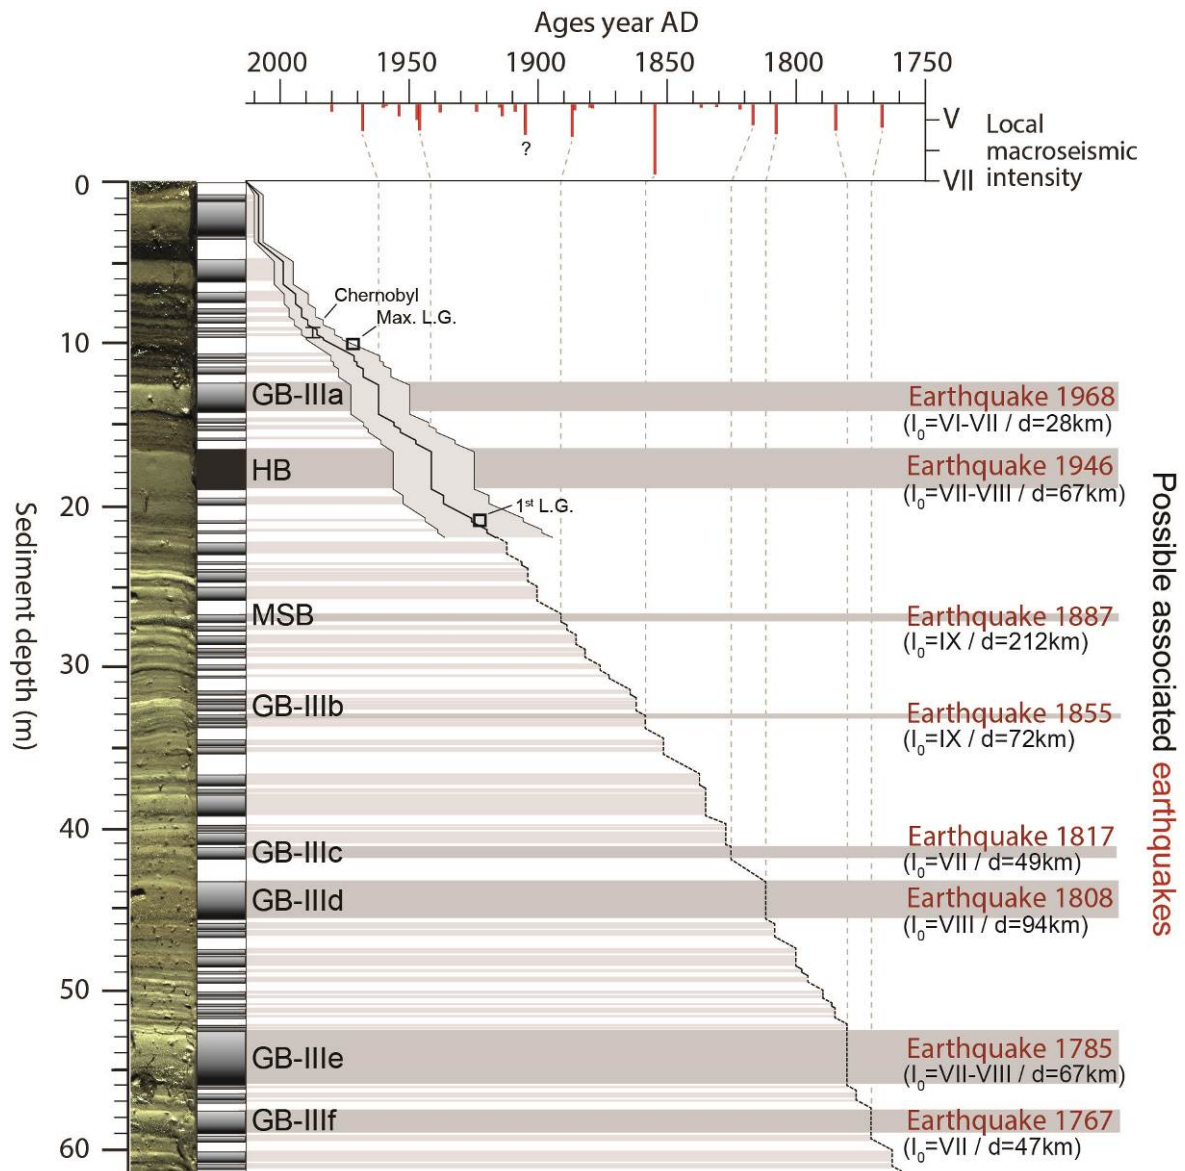

**Figure 7.** Age–depth relationship of core INF13P3 based on the  $^{210}\text{Pb}$ -based sedimentation rate (with  $1\sigma$  uncertainties) for the last century and based on the extrapolation of this sedimentation rate for the lower part of the core. The three chronological markers supporting the  $^{210}\text{Pb}$ -based sedimentation are shown: the  $^{137}\text{Cs}$  peak associated to the Chernobyl accident (AD 1986), the first use of leaded gasoline (1920s) and its maximal use (1970s). Labels (GB-III, HB and MSB) correspond to the mass-movement-induced deposits. Historical earthquakes, possibly associated to these mass-movement-induced deposits, are indicated. The upper panel represent the seismic intensity triggered by the strongest and/or closest historical earthquakes in the lake area.

## 5. Discussion

### 5.1. Lago Inferiore de Laures sediments: a record of past earthquakes?

#### 5.1.1. Trigger of MSB, HB, GB-III and the deformed layer

The MSB pattern in the Passega-type diagram suggests that the transport energy is supplied by the sediment weight rather than by a water current velocity, i.e. formation of concentrated density flows of suspended

sediments during a sub-aquatic mass movement (e.g. Mulder et Cochonnat, 1996; Arnaud et al., 2002; Wilhelm et al., 2016b). The HB characteristics are very similar to deposits previously described by many studies (e.g. Schnellmann et al. 2005; Beck 2009, Petersen et al., 2014). These studies proposed that a sub-aquatic mass movement triggers the oscillation of the whole lake water body (i.e. seiche), which homogenizes the sediment put in suspension by either the water oscillation or the mass movement. Therefore, HB most probably results also from a mass movement.

GBs are associated with turbidity currents triggered by either flood events or mass movements (e.g. Sturm and Matter, 1978; Shiki et al., 2000; Arnaud et al., 2002; Mulder and Chapron, 2011; Wilhelm et al., 2012b). In the latter case, they are formed by the sediment that is transported in suspension during the mass movement and then deposited over the mass-wasting deposits and/or further in the lake basin (e.g. Shiki et al., 2000; Schnellmann et al., 2005). These mass-movement-induced GBs are also known to be generally thicker than those induced by flood events because mass movements may mobilize much larger quantities of sediments than floods (e.g. Shiki et al., 2000; Schnellmann et al., 2005; Fanetti et al., 2008; Wilhelm et al., 2013). Accordingly, the rare GB-III characterized by large thicknesses may be associated to mass movements. The position of GB-IIIb on top of the deformed layer (Fig. 3) further supports this assumption because (i) the immediate stratigraphic succession suggests a common trigger for these two deposits and because of (ii) the ability of strong earthquake shaking to trigger (co-seismic) in situ deformation and (post-seismic) mass movements. Folded and mixed beds of the deformed layer are similar characteristics to the so-called “mixed layers” that result from shear stress applied to poorly consolidated sediments during strong earthquake shaking (e.g. Marco et al., 1996; Rodriguez-Pascua et al., 2000; Migowski et al., 2004; Monecke et al., 2004). Accordingly, the deformed layer is interpreted as the result of strong earthquake shaking. Because of the immediate stratigraphic succession with the GB-IIIb, these two beds are interpreted as one event layer triggered by a common earthquake.

### 5.1.2. Chronological control on the mass-movement-induced layers

Mass movements can be triggered by spontaneous failures due to overloading of slope sediments, snow avalanches, fluctuations in lake levels, rockfalls, or earthquakes (e.g., Van Daele et al., 2015; Wilhelm et al., 2016b). Here changes of lake level can be excluded because the water level of Lago Inferiore is well controlled by a bedrock outlet. Rockfalls seem also unlikely as there is no geomorphological evidence of major rockfalls in the catchment. Earthquakes are known to affect the region and may thus be a good candidate. In addition, the earthquake trigger is the only candidate to explain the in situ deformed layer with associated GB-IIIc. To test the earthquake trigger of all mass-movement-induced layers (i.e. GB-III, HB and MSB), their ages are compared to the dates of historical earthquakes well documented over the last centuries (database SisFrance, <http://www.sisfrance.net>; Lambert and Levret-Albaret, 1996; Scotti et al., 2004 and database CFTI4Med, <http://storing.ingv.it/cfti4med/>, Guidoboni et al., 2007). In addition to the chronological agreement, the potentially recorded earthquakes are also expected to be the strongest and/or the closest to the lake, as those are expected to have generated the largest ground motions in the lake area. To take into account this second parameter, the seismic intensity of each historical earthquake in the lake area was estimated in first order by using the following equation from Wilhelm et al. (2016b):

$$y = \alpha \cdot \ln(x) + b,$$

where  $x$  corresponds to the distance between the lake and the epicenter,  $y$  to the epicentral intensity of the historical earthquakes,  $\alpha$  to the slope of the attenuation curve fixed to 1,13 for the region, and  $b$  to the local seismic intensity. From this estimation, 9 earthquakes during the last 250 years triggered local seismic intensities above V (Fig. 7), i.e. intensities that may be strong enough to trigger seismically-induced deposits (e.g. Moernaut et al., 2014; Howarth et al., 2014; Van Daele et al., 2015; Wilhelm et al., 2016b). GB-IIIa and HB are dated to AD 1962  $\pm$ 12 and 1941  $\pm$ 16 years, respectively (Fig. 5). These dates correspond well to the two most recent and ‘strongest’ historical earthquakes occurring in AD 1968 and 1946 (Figs. 1 and 7). The extrapolation of the  $^{210}\text{Pb}$ -based sedimentation rate allows estimating ages of the older mass-movement-induced layers to AD 1891, 1859, 1826, 1811, 1780 and 1771 (Fig. 7). All of them correspond well to earthquakes expected to have triggered the largest ground motions in the lake area in AD 1887, 1855, 1817, 1808, 1785 and 1767. Age differences between deposits and associated historical earthquakes are lower than 5 years, except between GB-IIIc dated to AD 1826 and the AD 1817 Chamonix earthquake. Surprisingly, although as strong as the other earthquakes, the Chamonix earthquake (AD 1905) does not seem to have triggered a deposit. Overall, this good temporal agreement highly supports that mass-movement-induced layers may have been triggered by historical earthquakes.

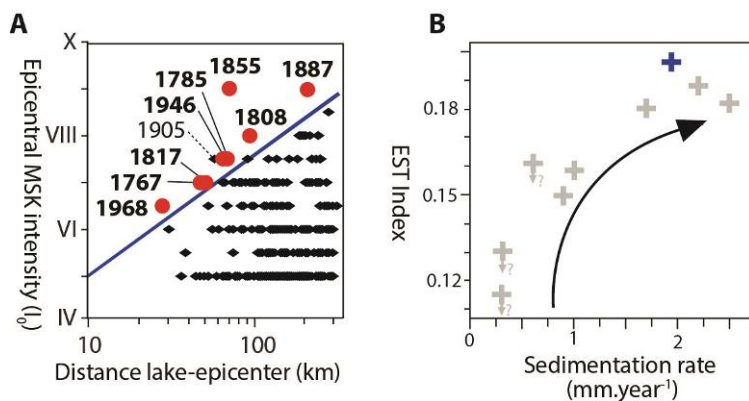

**Figure 8.** (A) Diagram “distance of earthquakes to the lake vs. epicentral MSK intensity” that aims at confirming that the earthquakes associated to the mass-movement-induced deposits are the strongest and/or the closest to the lake. Black crosses indicate all historic earthquakes closer than 120 km to the lakes with epicentral MSK intensities  $\geq$  IV. Red dots with dates correspond to historical earthquakes associated to the mass-movement-induced deposits in Figure 7. The sensitivity threshold (blue line) is placed to delimit the recorded from the non-recorded earthquakes. (B) The ‘Earthquake Sensitivity Threshold Index’ (ESTI) is compared to the sedimentation rate for Lago Inferiore de Laures (blue cross) and other similar Alpine lakes (grey crosses) studied by Wilhelm et al. (2016b). Arrows show that these ESTIs are maximum values.

### 5.1.3. Earthquake record and lake sensitivity

The record of eight earthquakes over  $\sim$ 270 years (i.e. return period of  $\sim$ 35 years) suggests a high sensitivity of Lago Inferiore de Laures to earthquake shaking, as such a high frequency of earthquake-induced deposits has rarely been observed in the region (e.g. Guyard et al., 2007; Lauterbach et al., 2012; Simonneau et al., 2013; Strasser et al., 2013; Kremer et al., 2015; Chapron et al., 2016; Wilhelm et al., 2016b). All historical earthquakes are plotted in a ‘distance vs. epicentral MSK intensity’ diagram (e.g. Monecke et al., 2004; Wilhelm et al., 2016b) where the recorded earthquakes are highlighted in red (Fig. 8A). To quantify and compare its sensitivity



to other lakes, an empirical threshold line was defined that limits the domains of the recorded from the non-recorded earthquakes (blue line in Fig. 8A). The 'Earthquake Sensitivity Threshold Index' (ESTI), defined as the inverse of the intercept of this threshold line with the intensity axis at 10 km from the lake (Wilhelm et al., 2016b), offers a direct comparison of sensitivity with these other lakes is possible. The ESTI score for Lago Inferiore reaches 0.19, i.e. the highest value of the Alpine lakes for which the sensitivity was quantified (Fig. 8B). This high sensitivity of Lago Inferiore to earthquake shaking may be explained by many factors like slope angle, sediment thickness or geotechnical properties of the sedimentary succession (e.g., Morgenstern, 1967; Strasser et al., 2011; Ai et al., 2014; Wiemer et al., 2015). However, Wilhelm et al. (2016b) suggested that the dominant factor explaining the lake sensitivity of such Alpine lakes is the sedimentation rate, i.e. that the lake sensitivity increases when the sedimentation rate increases, which is in agreement with the lake's high sedimentation rate (Fig. 8B).

## **5.2. Lago Inferiore de Laures sediments: a record of past floods?**

### **5.2.1. Trigger of GB-I and GB-II**

The high frequency of GB-I (66 deposits over 270 years, return period of ~4 years) makes it unlikely that these layers were the result of mass movements. In addition, the very uniform values of grain size and thickness characterizing GB-I suggest that they are triggered by processes where sediment erosion, transport and deposition are well controlled/regulated. Many studies suggested that the amount and grain size of eroded, transported and deposited material in case of flood events are controlled by the river discharge (e.g. Schiefer et al., 2011; Lapointe et al., 2012; Jenny et al., 2014; Wilhelm et al., 2015). Therefore, flood processes seem to be the best candidate to trigger GB-I.

The presence of grading in GB-II and their isolated positions in the 'percentile vs. thickness' diagram are similar characteristics to GB-III and HB, suggesting a common trigger for both GB-II and GB-III, i.e. mass movements. The two GB-II are dated to AD 2006  $\pm$ 2 and 1997  $\pm$ 4 yrs., respectively (Fig. 5). An earthquake trigger is very unlikely as no strong and/or close earthquake occurred at that time. A mass-movement trigger can, however, not be excluded. Alternatively, Giguët-Covex et al. (2011) suggested that thickness of flood-induced GBs may significantly increase without changes in grain size when human impact, i.e. grazing pressure in such high-elevation catchments, became high. Sheep grazing and trampling would accelerate the mechanical soil degradation, making erosion processes higher during floods. In this way, GB-II may also be triggered by floods at time of high grazing activity, which currently occurs close to the lake as evidenced by the sheep pen located on the shoreline of Lago Inferiore. In addition, these deposits appear in the uppermost part of the cores characterized by high organic matter content. This higher content of lacustrine organic matter might result from a higher primary production linked to an increase of nutrients inputs with the higher grazing activity.

### **5.2.2. Chronological control on flood-induced deposits**

The assignment of a flood trigger to GB-I and GB-II may be assessed by using historical flood data. A direct comparison between deposit ages and historical flood dates is precluded because the outlet stream of Lago Inferiore does not flow through any village downstream. Instead, the frequency of GB-I and GB-II occurrences

was compared to the frequency of historical summer-autumn floods that affected streams and villages around Lago Inferiore as documented by Mercalli et al. (2003). For the comparison, a historical flood event that occurred in mid-May (AD 1926) was not considered as we assume that the lake was frozen at that time. Over the last century, historical data reveal a high flood frequency (up to 4 floods per 11 years) during periods AD 1900-1920 and AD 1950-2010 and a low frequency (less than 1 flood per 11 years) during the period AD 1920-1950 (Fig. 9). This multi-decennial variability in flood frequency is well reproduced by the sediment record when considering both GB-I and GB-II. Indeed, both the three time periods and the range of flood-frequency values (from 1 to 4 per 11 years) are very similar between records. If GB-II are removed from the sediment record, the reconstructed flood frequency shows a more pronounced decrease over the last decades (orange line in Fig. 9) than in the historical record. This may support a flood trigger (during a period of high grazing activity) for GB-II. Overall, the good agreement with the historical data, when considering both GB-I and GB-II, supports that Lago Inferiore sediments are a good recorder of the decennial variability of past floods.

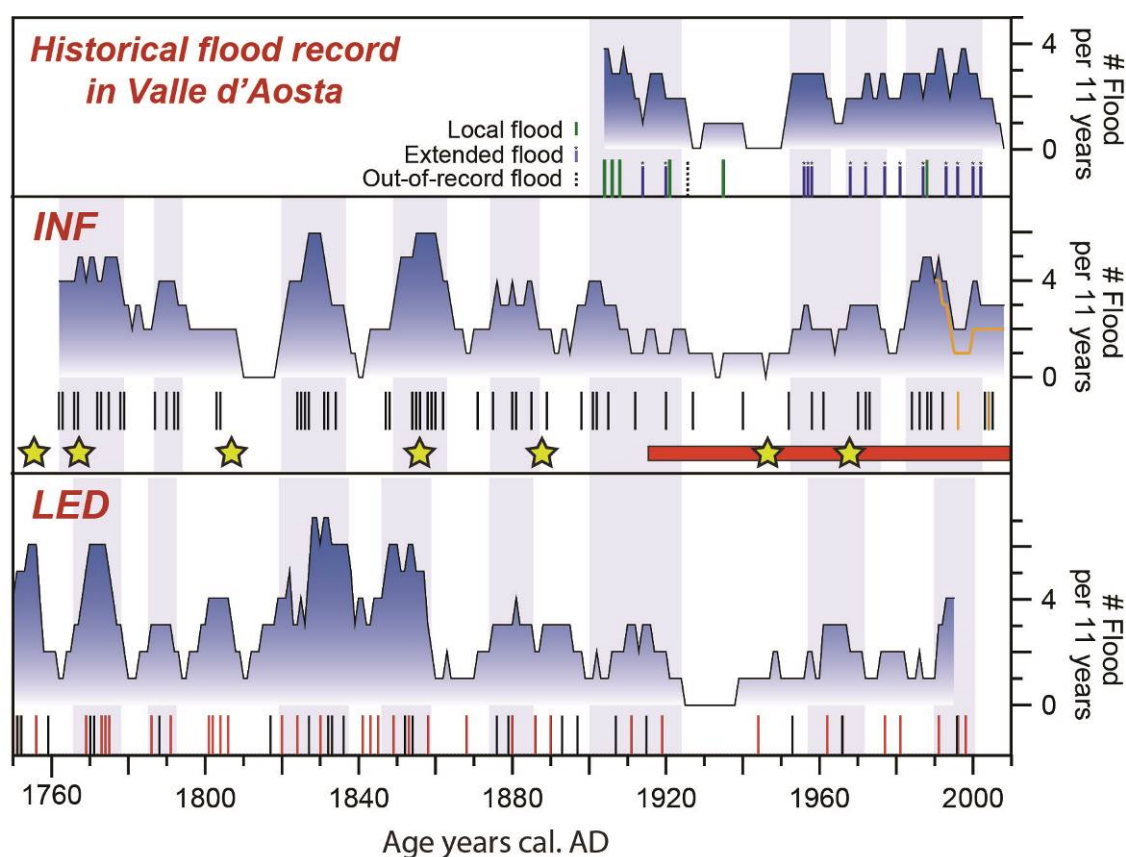

**Figure 9.** Comparison of the reconstructed Lago Inferiore de Laures flood frequency (11-years running sum) with the frequency (11-years running sum) of historical floods in Aosta Valley (Mercalli et al., 2003) and the frequency of summer-autumn floods recorded in Lago di Ledro (Wirth et al., 2013). Vertical bars correspond to flood occurrences. For Lago Inferiore de Laures, the two orange vertical bars correspond to the GB-II. The orange curve corresponds to the flood frequency when these two deposits are not considered. Yellow stars correspond to the earthquake-induced deposits indicated as chronological markers. For Lago di Ledro record, black vertical bars correspond to summer floods and red vertical bars to autumn floods.

### 5.2.3. Paleoflood record in the regional climatic setting

Historical data revealed that flood events mostly occurred in summer and autumn (20 of 21), i.e. during the ice-free season of the lake. Hence, the variability of floods that impacted communities in Valle d'Aosta is well represented by the flood activity recorded in the Lago Inferiore sediment sequence. Among these events, 5 occurred in summer and early autumn and affected a localized area (i.e. only one mountain stream, Mercalli et al., 2003). According to the season and their limited spatial extent, these events are most probably triggered by local convective events, i.e. thunderstorms. The 15 other events occurred equally in summer and autumn and affected many tributaries and/or the main Dora Baltea River. As these events affected large catchments (ca. 200-2000 km<sup>2</sup>), they are most probably related to mesoscale convective events typical of the Mediterranean climate. Thereby, the flood activity recorded in Lago Inferiore sediments is mainly related to large scale hydro-meteorological events and may represent a 'regional' signal of the past summer-autumn flood variability. As these mesoscale events are formed by humid air masses from the Mediterranean that flow northward through the Po Plain until the Alps, they may also trigger floods in many Alpine regions located north of the Po Plain.

To test the 'regional' character of the reconstructed flood signal, the Lago Inferiore de Laures flood record was compared to the Lago di Ledro flood record. Lago di Ledro is a low-elevation lake (660 m a.s.l.) located 280 km east from Lago Inferiore de Laures, in the eastern part of the Alpine region located north to the Po Plain (Fig. 1). Floods in Ledro catchment (111 km<sup>2</sup>) also occur mainly in summer and autumn due to mesoscale convective events (Wirth et al., 2013). The extrapolation of the sedimentation rate enables to extend the centennial Lago Inferiore de Laures flood record to the last 270 years (Fig. 7). From the comparison with the Lago di Ledro flood record (Fig. 9), we observe that the range of flood-frequency values is in agreement between the two records, i.e. between 0 and 6 floods per 11 years. Secondly, we observe strong similarities in the two flood records with periods of high flood frequency in AD 1760-1780, 1785-1795, 1820-1835, 1875-1885, 1955-1975 and after 1990 and periods of low flood frequency in AD 1780-1785, 1810-1820, 1860-1875 and 1925-1955. However, some discrepancies between the two records can be noticed around AD 1800, 1890-1920 and 1980-1990. They may be related to localized events, e.g. thunderstorms, which may have different spatial and temporal dynamics between sites as evidenced by the record of several local floods between AD 1900 and AD 1910 (Fig. 9). Overall, there is a good agreement in the main trends of the flood frequencies, suggesting that the two flood records dominantly represent the decennial variability of mesoscale convective events triggering floods in this part of the Mediterranean Alps.

## 6. Conclusion

The high-resolution sedimentological study of Lago Inferiore de Laures revealed 77 beds that correspond to 76 event layers over the last ca. 270 years. A detailed analysis suggested that 8 of 76 event layers are related to mass-movement events, while 66 of 76 are most probably related to flood events. The trigger of 2 event layers (those labelled GB-II) still remains uncertain. The temporal assignment suggests a flood trigger during a period of high grazing activity. However, further work is still required to confirm this hypothesis, e.g. by studying proxy of grazing activity like coprophilous fungal ascospores (e.g. Davis and Schafer, 2006; Etienne et al., 2013).

The 8 mass movements were chronologically compared to the well documented historical seismicity. The comparison revealed that mass movements in Lago Inferiore de Laures are most probably triggered by strong (epicentral MSK intensity of VI-IX) and/or close (distance to the lake of 25-120 km) earthquakes. Compared to other Alpine lakes, the high frequency of earthquake-induced mass movements (8 over ca. 270 years) suggested a high sensitivity of Lago Inferiore de Laures sediments to earthquake shaking. Indeed, this lake appeared to be regionally the most sensitive with an ESTI value of 1.9, that may be explained by its high sedimentation rate.

The frequency of flood-induced deposits was compared to the frequency of historical summer-autumn floods that affected mountain streams and rivers in Valle d'Aosta. This showed that the (multi-)decennial frequency of flood events that impacted local populations is well reproduced by the sedimentary record. The comparison with the flood record of Lago di Ledro, located 280 km east, suggested that the main trends of the (multi-) decennial flood variability are in good agreement between records, suggesting a 'regional' character of the two reconstructed flood signals linked to the typical Mediterranean mesoscale precipitation events.

Hence, this study showed that Lago Inferiore de Laures sediments seem to be a remarkable record of earthquakes and floods, both natural hazards harming populations of this Alpine region. This should encourage further study to extend the Lago Inferiore de Laures record further back in time. Such a long-term record of natural hazards would improve our knowledge on the natural hazard occurrence and, thereby, enabling a better risk assessment.

## Acknowledgments

B. Wilhelm's post-doctoral fellowship (2013-2014) was supported by a grant from the AXA Research Fund. We would also like to thank Pierre Sabatier for his help to interpret the <sup>210</sup>Pb data.

## References

- Ai, F., M. Strasser, B. Preu, T. J. J. Hanebuth, S. Krastel, and Kopf A.: New constraints on the oceanographic vs. seismic control on submarine landslides initiation: A geotechnical approach off Uruguay and northern Argentina, *Geo Mar. Lett.*, 34(5), 399–417, 2014.
- Amann, B., S. Sönke, and Grosjean, M.: A millennial-long record of warm season precipitation and flood frequency for the Northwestern Alps inferred from varved lake sediments: implications for the future, *Quaternary Sci. Rev.*, 115, 89–100, 2015.
- Appleby, P. G., N. Richardson and Nolan, P. J.: <sup>241</sup>Am dating of lake sediments, *Hydrobiologia*, 214, 35–42, 1991.
- Arnaud, F., V. Lignier, M. Revel, M. Desmet, M. Pourchet, C. Beck, F. Charlet, A. Trentesaux, and Tribovillard N.: Flood and earthquake disturbance of <sup>210</sup>Pb geochronology (Lake Anterne, North French Alps), *Terra Nova*, 14, 225–232, 2002.
- Arnaud, F., M. Revel-Rolland, D. Bosch, T. Winiarski, E. Chapron, M. Desmet, N. Tribovillard, and N. Givélet: A reliable 300 years-long history of lead contamination in Northern French Alps from distant lake sediment records, *J. Environ. Monit.*, 6(5), 448–456, 2004.
- Avşar, U., A. Hubert-Ferrari, M. De Batist, G. Lepoint, S. Schmidt, and N. Fagel: Seismically-triggered organic-rich layers in recent sediments from Göllüköy Lake (North Anatolian Fault, Turkey), *Quat. Sci. Rev.*, 103, 67–80, 2014.



- 452 Ballesteros-Cánovas J.A., Stoffel M., St George S., Hirschboeck K.: A review of flood records from tree rings. Progress in  
453 Physical Geography, 39(6) 794–816, 2015.
- 454 Beck, C.: Late Quaternary lacustrine paleo-seismic archives in north-western Alps: Examples of earthquake-origin  
455 assessment of sedimentary disturbances, Earth Sci. Rev., 96(4), 327–344, 2009.
- 456 Benito G., Macklin M.G., Panin A., Rossato S., Fontana A., Jones A.F., Machado M.J., Matlakhova E., Mozzi P., Zielhofer  
457 C.: Recurring flood distribution patterns related to short-term Holocene climatic variability. Science reports 5, 1-8,  
458 2015.
- 459 Boschi E., Guidoboni, E., Ferrari. G., Mariotti, D., Valensise. G. and P. Gasperini: Catalogue of Strong Italian Earthquakes,  
460 Ann. Geofis., 43 (4), 268, 2000.
- 461 Brázdil, R., Kundzewicz, Z. W., Benito, G., Demarée, G., Macdonald, N., and Roald, L. A.: Historical floods in Europe in  
462 the past Millennium, in: Changes in Flood Risk in Europe, edited by: Kundzewicz, Z. W., IAHS Press, Wallingford,  
463 121– 166, 2012
- 464 Buzzi, A. and Foschini, L.: Mesoscale meteorological features associated with heavy precipitation in the Southern Alpine  
465 Region, Meteorol. Atmos. Phys., 72, 131–146, 2000.
- 466 Chapron E., Simonneau A., Ledoux G., Arnaud F., Lajeunesse P. and Albéric P.: French Alpine Foreland Holocene  
467 Paleoseismicity Revealed by Coeval Mass Wasting Deposits in Glacial Lakes. In: G. Lamarche et al. (eds.), Submarine  
468 Mass Movements and their Consequences, Advances in Natural and Technological Hazards Research 41, 341-349,  
469 2016.
- 470 Croudace, I. W., Rindby, A., and Rothwell, R. G.: ITRAX: description and evaluation of a new multi-function X-ray core  
471 scanner, in: New Techniques in Sediment Core Analysis, edited by: Rothwell, R. G., Geological Society, London,  
472 Special Publications, 367, 51–63, 2006.
- 473 Denniston R.G., Villarini G., Gonzales A.N., Wyrwoll K.H., Polyak V.J., Ummenhofer C.C, Lachniet M.S., Wanamaker Jr.  
474 A.D., Humphreys W.F., Woods D. and Cugley J.: Extreme rainfall activity in the Australian tropics reflects changes in  
475 the El Niño/Southern Oscillation over the last two millennia. Proc Natl Acad Sci USA 112(15):4576–4581, 2015.
- 476 Etienne, D., Wilhelm, B., Sabatier, P., Reyss, J.-L. and Arnaud, F.: Influence of sample location and livestock numbers on  
477 Sporormiella concentrations and accumulation rates in surface sediments of Lake Allos, French Alps. Journal of  
478 Paleolimnology 49, 117-127, 2013.
- 479 Eva C., Barani S., Carenzo G., De Ferrari R., Eva E., Ferretti G., Pasta M., Pavan M., Scafidi D., Solarino S., Spallarossa D.,  
480 Turino C., Zunino E.: 30 years of seismicity in the South-western Alps and Northern Apennines as recorded by the  
481 Regional Seismic network of Northwestern Italy. Proceedings of GNGTS 2010, Prato, Italy, 2010.
- 482 Fäh, D., Giardini, D., Kästli, P., Deichmann, N., Gisler, M., Schwarz-Zanetti, G., Alvarez-Rubio, S., Sellami, S., Edwards,  
483 B., Allmann, B., Bethmann, F., Wössner, J., Gassner-Stamm, G., Fritsche, S., Eberhard, D.: ECOS-09 Earthquake  
484 Catalogue of Switzerland Release 2011. Report and Database. Public catalogue, 17.4.2011. Swiss Seismological  
485 Service ETH Zürich, Report SED/RISK/R/001/20110417, 2011.
- 486 Fanetti, D., F. S. Anselmetti, E. Chapron, M. Sturm, and Vezzoli L.: Megaturbidite deposits in the Holocene basin fill of  
487 Lake Como (southern Alps, Italy), Palaeogeogr. Palaeoclimatol. Palaeoecol., 259, 323–340, 2008.
- 488 Gani, M. R.: From turbid to lucid: A straightforward approach to sediment gravity flows and their deposits, Sediment. Rec.,  
489 2, 4–8, 2004.
- 490 Gaume, E., Bain, V., Bernardara, P., Newinger, O., Barbuc, M., Bateman, A., Blaškovicčová, L., Blöschl, G., Borga, M.,  
491 Dumitrescu, A., Daliakopoulos, I., Garcia, J., Irimescu, A., Kohnova, S., Koutroulis, A., Marchi, L., Matreata, S.,

492 Medina, V., Preciso, E., Sempere-Torres, D., Stancalie, G., Szolgay, J., Tsanis, I., Velasco, D. and Viglione, A.: A  
493 collation of data on European flash floods. *J. Hydrol.* 367, 70–78, 2009.

494 Giguët-Covex C., Arnaud, F., Poulenard, J., Disnar, J.R., Delhon, C., Francus, P., David, F., Enters, 34 D., Rey, P.-J.,  
495 Delannoy, J.-J.: Changes of erosion patterns during the Holocene in a currently 35 treeless subalpine catchment inferred  
496 from lake sediment geochemistry (Lake Anterne, 2063 m asl, 36 NW French Alps). *The Holocene* 21, 651–665, 2011.

497 Gilli, A., Anselmetti, F. S., Glur, L., and Wirth, S. B.: Lake sediments as archives of recurrence rates and intensities of past  
498 flood events, in: *Dating Torrential Processes on Fans and Cones – Methods and Their Application for Hazard and Risk*  
499 *Assessment*, edited by: Schneuwly-Bollschweiler, M., Stoffel, M., and Rudolf-Miklau, F., *Adv. Glob. Change Res.*, 47,  
500 225–242, 2012.

501 Goldberg, E. D.: *Geochronology with <sup>210</sup>Pb Radioactive Dating*, IAEA, Vienna, 121–131, 1963.

502 Guidoboni, E., Ferrari, G., Mariotti, D., Comastri, A., Tarabusi, G., and Valensise, G.: Catalogue of strong earthquakes in  
503 Italy 461B.C.–1997 and Mediterranean area 760 B.C.–1500, 2007, available from <http://storing.ingv.it/cfti4med>, 2007.

504 Guyard H, Chapron E, St-Onge G, Anselmetti, F.S., Arnaud, F., Magand, O., Francus, P. and Melières, MA.: High-altitude  
505 varve records of abrupt environmental changes and mining activity over the last 4000 years in the Western French Alps  
506 (Lake Bramant, Grandes Rousses Massif). *Quaternary Science Reviews* 26: 2644–2660, 2007.

507 Guzzetti, F. and Tonelli, G.: Information system on hydrological and geomorphological catastrophes in Italy (SICI): a tool for  
508 managing landslide and flood hazards. *Natural Hazards and Earth System Sciences* 4, 213–232, 2004.

509 Howarth, J.D., Fitzsimons, S.J., Norris, R.J. and Jacobsen, G.E.: Lake sediments record high intensity shaking that provides  
510 insight into the location and rupture length of large earthquakes on the Alpine Fault, New Zealand. *Earth and Planetary*  
511 *Science Letters* 403, 340–351, 2014

512 Jenny, J.-P., Wilhelm, B., Arnaud, F., Sabatier, P., Giguët-Covex, C., Mélo, A., Fanget, B., Malet, E., Ployon, E., and Perga,  
513 M.E., A 4D sedimentological approach to reconstructing the flood frequency and intensity of the Rhône River (Lake  
514 Bourget, NW European Alps), *J. Paleolimnol.*, 51, 469–483, 2014.

515 Kremer, K., Corella, J.P., Adatte, T., Garnier, E., Zenhäusern, G. and Girardclos S., Origin of turbidites in deep Lake Geneva  
516 (France-Switzerland) in the last 1500 years. *J. of Sed. Res.* 85, 1455–1465, 2015.

517 Lambert, J., and Levret-Albaret A. : *Mille ans de Séismes en France. Catalogues d'Épicentres, Paramètres et Références*,  
518 Ouest-Editions ed., 78 pp., Presses Académiques, Nantes, 1996.

519 Lapointe, F., Francus, P., Lamoureaux, S.F., Said, M. and Cuvén, S.: 1,750 years of large rainfall events inferred from  
520 particle size at East Lake, Cape Bounty, Melville Island, Canada. *J Paleolimnol* 48(1):159–173, 2012.

521 Larroque, C., O. Scotti, and Ioualalen, I.: Reappraisal of the 1887 Ligurian earthquake [western Mediterranean] from  
522 macroseismicity, active tectonics and tsunami modelling, *Geophys. J. Int.*, 190, 87–104, 2012.

523 Lauterbach, S., Chapron, E., Hüls, M., Gilli, A., Arnaud, F., Piccin, A., Nomade, J., Desmet, M., von Grafenstein, U., and  
524 DecLakes Participants: A sediment record of Holocene surface runoff events and earthquake activity from Lake Iseo  
525 (Southern Alps, Italy). *Holocene* 22, 749–760, 2012.

526 Lionello, P., Abrantes, F., Congedi, L., Dulac, F., Gacic, M., Gomis, D., Goodess, C., Hoff, H., Kutiel, H., Luterbacher, J.,  
527 Planton, S., Reale, M., Schröder, K., Struglia, M. V., Toreti, A., Tsimplis, M., Ulbrich, U., and Xoplaki, E.:  
528 Introduction: Mediterranean Climate: Background Information, edited by: Lionello, P., *The Climate of the*  
529 *Mediterranean Region, From the Past to the Future*, Amsterdam: Elsevier (Netherlands), XXXV–IXXX,  
530 ISBN:9780124160422, 2012.

531 Marchi L., Borga M., Preciso E. and Gaume E.: Characterisation of selected extreme flash floods in Europe and implications  
532 for flood risk management. *J. of Hydrol.* 394 (1-2), 118-133, 2010..

533 Marco, S., Stein, M., Agnon, A., and Ron, H.: Long -term earthquake c  
534 Dead Sea Graben. *Journal of Geophysical Research: Solid Earth*, 101(B3), 6179-6191, 1996.

535 Mercalli, L., Cat Berro, D., Montuschi, S., Castellano, C., Ratti, M., Di Napoli, G., Mortara, G., and Guidani, N.: *Atlante*  
536 *climatico della Valle d'Aosta, Societa Meteorologica Subalpina, Torino, 2003.*

537 Migowski, C., A. Agnon, R. Bookman, J. F. W. Negendank, and Stein M.: Recurrence pattern of Holocene earthquakes along  
538 the Dead Sea transform revealed by varve-counting and radiocarbon dating of lacustrine sediments, *Earth Planet. Sci.*  
539 *Lett.*, 222(1), 301–314, 2004.

540 Moernaut, J., M. Van Daele, K. Heirman, K. Fontijn, M. Strasser, M. Pino, R. Urrutia, and De Batist M.: Lacustrine  
541 turbidites as a tool for quantitative earthquake reconstruction: New evidence for a variable rupture mode in south  
542 central Chile, *J. Geophys. Res. Solid Earth*, 119, 1607–1633, 2014.

543 Monecke, K., F. S. Anselmetti, A. Becker, M. Sturm, and Giardini D.: The record of historic earthquakes in lake sediments of  
544 Central Switzerland, *Tectonophysics*, 394, 21–40, 2004.

545 Morgenstern, N. R.: *Submarine Slumping and Initiation of Turbidity Currents*, edited by A. F. Richards, pp. 189–220, Mar.  
546 *Geotechnique UP, Urbana, Ill, 1967.*

547 Mulder, T., and E. Chapron: Flood deposits in continental and marine environments: Character and significance, in *Sediment*  
548 *Transfer From Shelf to Deep Water—Revisiting the Delivery System RM*, AAPG Stud. Geol., vol. 61, edited by S. C.  
549 *Zavala*, 1–30, 2011.

550 Mulder, T., and P. Cochonat: Classification of offshore mass movements, *J. Sediment. Res.*, 66(1), 43–57, 1996.

551 München Re Group: Annual review: natural catastrophes 2002. München Re Group, München, p 62, 2003.

552 Passega, R.: Grain-size representation by CM patterns as a geological tool, *J. Sediment. Petrol.*, 34, 830–847, 1964.

553 Petersen, J., B. Wilhelm, M. Revel, Y. Rolland, C. Crouzet, F. Arnaud, E. Brisset, E. Chaumillon, and Magand O.: Sediments  
554 of Lake Vens (SW European Alps, France) record large-magnitude earthquake events, *J. Paleolimnol.*, 51(3), 343–355,  
555 2014.

556 Renberg, I., R. Bindler, and Brännvall M.L.: Using the historical atmospheric lead-deposition record as a chronological marker  
557 in sediment deposits in Europe, *Holocene*, 11(5), 511–516, 2001.

558 Ratto, S., Bonetto, F., and Comoglio, C.: The October 2000 flooding in Valle d'Aosta (Italy): Event description and land  
559 planning measures for the risk mitigation. *International Journal of River Basin Management*, 1(2), 105-116, 2003.

560 Rizza, M., Ritz, J. F., Braucher, R., Vassallo, R., Prentice, C., Mahan, S. and Demberel, S.: Slip rate and slip magnitudes of  
561 past earthquakes along the Bogd left-lateral strike-slip fault (Mongolia). *Geophysical Journal International*, 186(3),  
562 897-927, 2011.

563 Rodriguez-Pascua, M. A., V. H. Garduno-Monroy, I. Israde-Alcantara, and Pérez-Lopez R.: Estimation of the paleoepicentral  
564 area from the spatial gradient of deformation in lacustrine seismites (Tierras Blancas Basin, Mexico), *Quat. Int.*, 219,  
565 66–78, 2010.

566 Schiefer, E., Gilbert, R., and Hassan, M. A.: A lake sediment-based proxy of floods in the Rocky Mountain Front Ranges,  
567 Canada, *J. Paleolimnol.*, 45, 137–149, 2011.

568 Schillereff, D. N., Chiverrell, R. C., Macdonald, N., and Hooke, J. M.: Flood stratigraphies in lake sediments: A  
569 review. *Earth-Science Reviews*, 135, 17-37, 2014.

570 Schillereff, D. N., Chiverrell, R. C., Macdonald, N., and Hooke, J. M.: Hydrological thresholds and basin control over  
571 paleoflood records in lakes. *Geology*, 44(1), 43-46, 2016.

572 Schmidt, S., H. Howa, A. Diallo, J. Martín, M. Cremer, P. Duros, Ch. Fontanier, B. Deflandre, E. Metzger, and Mulder T.:  
573 Recent sediment transport and deposition in the Cap-Ferret Canyon, South-East margin of Bay of Biscay, Deep Sea  
574 Research II, 104, 134-144, doi:10.1016/j.dsr2.2013.06.004, 2014.

575 Schnellmann, M., F. S. Anselmetti, D. Giardini, and McKenzie J. A.: Mass-movement-induced fold-and-thrust belt structures  
576 in unconsolidated sediments in Lake Lucerne (Switzerland), *Sedimentology*, 52, 271–289, 2005.

577 Scotti, O., D. Baumont, G. Quenet, and Levret A.: The French macroseismic database SISFRANCE: Objectives, results and  
578 perspectives, *Ann. Geophys.*, 47(2), 571–581, 2004.

579 Shiki, T., Kumon, F., Inouchi, Y., Kontani, Y., Sakamoto, T., Tateishi, M. and Fukuyama, K.: Sedimentary features of the  
580 seismo-turbidites, Lake Biwa, Japan. *Sedimentary Geology*, 135(1), 37-50, 2000.

581 Simonneau, A., Chapron, E., Vannière, B., Wirth, S. B., Gilli, A., Di Giovanni, C., Anselmetti, F. S., Desmet, M., and  
582 Magny, M.: Mass-movement and flood-induced deposits in Lake Ledro, southern Alps, Italy: implications for  
583 Holocene palaeohydrology and natural hazards, *Clim. Past*, 9, 825–840, 2013.

584 Støren, E. N., Olaf Dahl, S., Nesje, A., and Paasche Ø.: Identifying the sedimentary imprint of high-frequency Holocene river  
585 floods in lake sediments: development and application of a new method, *Quaternary Sci. Rev.*, 29, 3021–3033, 2010.

586 Strasser, M., F. S. Anselmetti, F. Donat, D. Giardini, and Schnellmann M.: Magnitudes and source areas of large prehistoric  
587 northern Alpine earthquakes revealed by slope failures in lakes, *Geology*, 12, 1005–1008, 2006.

588 Strasser, M., M. Hilbe, and Anselmetti F.S.: Mapping basin-wide subaquatic slope failure susceptibility as a tool to assess  
589 regional seismic and tsunami hazards, *Mar. Geophys. Res.*, 32, 331–347, 2011.

590 Strasser, M., K. Monecke, M. Schnellmann, and Anselmetti F.S.: Lake sediments as natural seismographs: A compiled  
591 record of Late Quaternary earthquakes in Central Switzerland and its implication for Alpine deformation,  
592 *Sedimentology*, 60, 319–341, 2013.

593 Sturm, M., and Matter A.: Turbidites and varves in Lake Brienz (Switzerland): Deposition of clastic detritus by density  
594 currents, in *Modern and Ancient Lake Sediments*, edited by A. Matter and M. E. Tucker, Int. Assoc. Sedimentol. Spec.  
595 Publ., 2, 147–168, 1978.

596 Ratzov, G., Cattaneo, A., Babonneau, N., Déverchère, J., Yelles, K., Bracene, R., & Courboux, F.: Holocene turbidites  
597 record earthquake supercycles at a slow-rate plate boundary. *Geology*, 43(4), 331-334, 2015.

598 Van Daele, M., Moernaut, J., Doom, L. , Boes, E. , Fontijn, K., Heirman, K. , Vandoorne, W., Hebbeln, D., Pino, M., Urrutia,  
599 R., Brümmer, R., and De Batist, M.: A comparison of the sedimentary records of the 1960 and 2010 great Chilean  
600 earthquakes in 17 lakes: Implications for quantitative lacustrine palaeoseismology, *Sedimentology*, 62, 1466–1496,  
601 2015.

602 Vanniere, B., Magny, M., Joannin, S., Simonneau, A., Wirth, S. B., Hamann, Y. and Anselmetti, F. S.: Orbital changes,  
603 variation in solar activity and increased anthropogenic activities: controls on the Holocene flood frequency in the Lake  
604 Ledro area, Northern Italy. *Climate of the Past*, 9(3), 1193-1209, 2013.

605 Weiss, D., Shotyk, W., Kramers, J. D., and Gloor, M.: Sphagnum mosses as archives of recent and past atmospheric lead  
606 deposition in Switzerland. *Atmospheric Environment*, 33(23), 3751-3763, 1999.



607 Wiemer, G., J. Moernaut, N. Stark, P. Kempf, M. De Batpist, M. Pino, R. Urrutia, B. Ladrón de Guevara, M. Strasser, and  
608 Kopf A.: The role of sediment composition and behavior under dynamic loading conditions on slope failure initiation:  
609 A study of a subaqueous landslide in earthquake-prone South-Central Chile, *Int. J. Earth Sci.*, 104(5), 1439–1457,  
610 2015.

611 Wilhelm, B., Arnaud, F., Sabatier, P., Crouzet, C., Brisset, E., Chaumillon, E., Disnar, J. R., Guiter, F., Malet, E., Reyss, J. L.,  
612 Tachikawa, K., Bard, E., and Delannoy, J. J.: 1400 years of extreme precipitation patterns over the Mediterranean  
613 French Alps and possible forcing mechanisms, *Quaternary Res.*, 78, 1–12, 2012a.

614 Wilhelm, B., F. Arnaud, D. Enters, F. Allignol, A. Legaz, O. Magand, S. Revillon, C. Giguët-Covex, and Malet E.: Does  
615 global warming favour the occurrence of extreme floods in European Alps? First evidences from a NW Alps proglacial  
616 lake sediment record, *Clim. Change*, 113, 63–581, 2012b.

617 Wilhelm, B., Arnaud, F., Sabatier, P., Magand, O., Chapron, E., Courp, T., Tachikawa, K., Fanget, B., Malet, E., Pignol, C.,  
618 Bard, E., and Delannoy, J. J.: Palaeoflood activity and climate change over the last 1400 years recorded by lake  
619 sediments in the NW European Alps, *J. Quat. Sci.*, 28, 189–199, 2013.

620 Wilhelm, B., P. Sabatier, and Arnaud F.: Is a regional flood signal reproducible from lake sediments?, *Sedimentology*, 62(4),  
621 1103–1117, 2015.

622 Wilhelm B., Vogel H., Crouzet C., Etienne D. and Anselmetti F.S.: Frequency and intensity of palaeofloods at the interface  
623 of Atlantic and Mediterranean climate domains, *Climate of the Past* 12, 299–316, 2016a.

624 Wilhelm, B., Nomade, J., Crouzet, C., Litty, C., Sabatier, P., Belle, S. and Anselmetti, F.S.: Quantified sensitivity of small  
625 lake sediments to record historic earthquakes: Implications for paleoseismology. *J. Geophys. Res.: Earth Surface*, 121  
626 (1), 2–16, 2016b.

627 Wirth, S. B., Gilli, A., Simonneau, A., Ariztegui, D., Vannière, B., Glur, L., Chapron, E., Magny, M., and Anselmetti, F. S.:  
628 A 2000-year long seasonal record of floods in the southern European Alps, *Geophys. Res. Let.*, 40, 4025–4029, 2013.
